# Supplementary material for: A Ag-molecularly imprinted polymer composite for efficient surface-enhanced Raman scattering activities under a low-energy laser
Source: Royal Society of Chemistry journal article supplement (doi:10.1039/c4an02301c), 2015-01-01
Supplement: c4an02301c1.pdf [file c4an02301c1.pdf]

## Supplementary Information for Ag-molecularly Imprinted Polymer Composite for Efficient Surface-enhanced Raman Scattering Activities under Low-energy Laser

Shaona Chen,<sup>a</sup> Xin Li,<sup>\*a,b</sup> Yan Guo,<sup>a</sup> and Jingyao Qi<sup>\*c</sup>

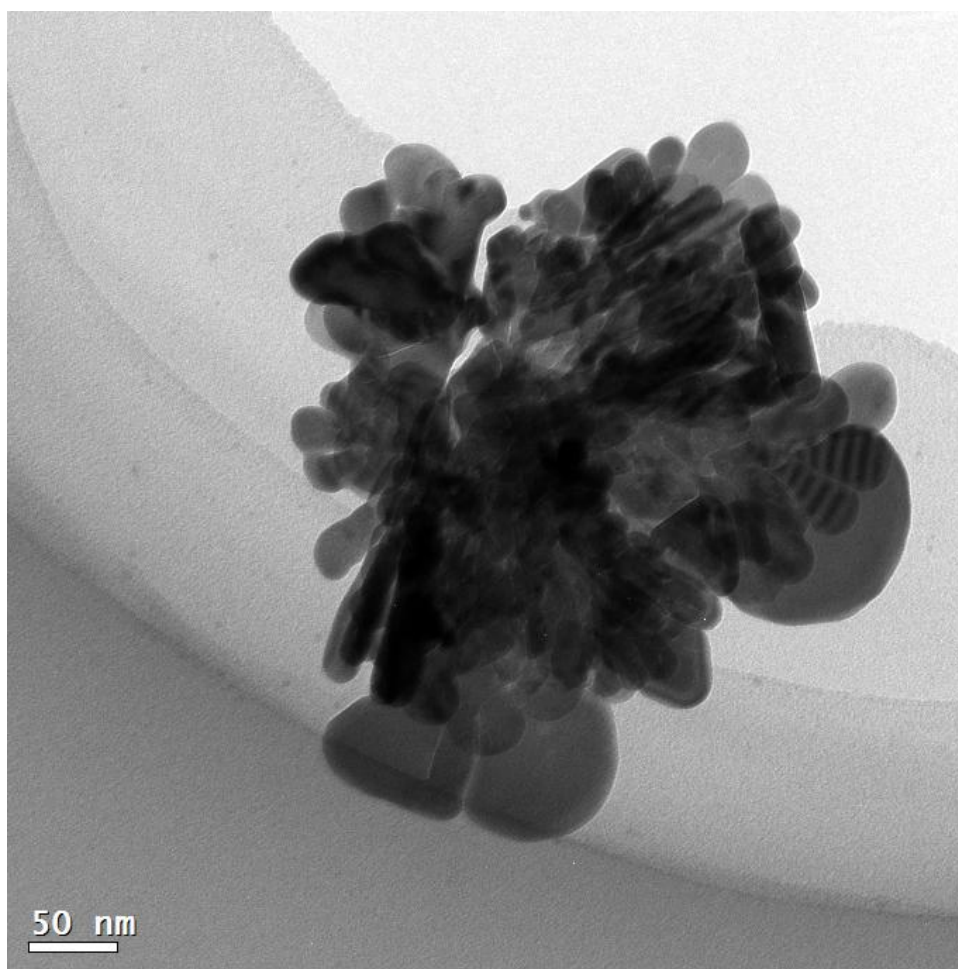

**Fig.S1** TEM image of Ag.

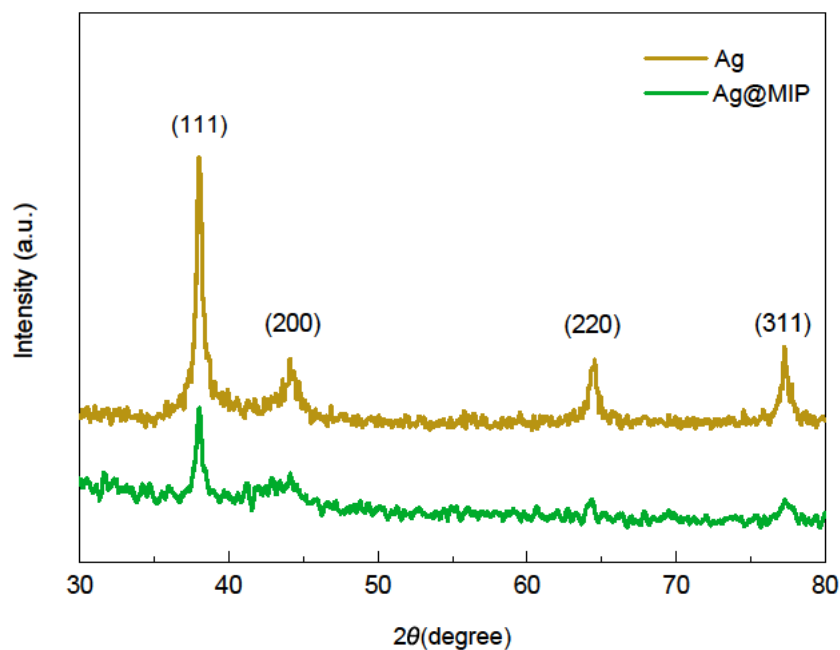

**Figure S2** The X-ray powder diffraction (XRD) patterns of the Ag and Ag@MIP. The four distinct diffraction peaks at  $2\theta = 38.08^\circ$ ,  $44.18^\circ$ ,  $64.35^\circ$  and  $77.22^\circ$  can be corresponding to the (111), (200), (220), and (311) crystal planes of face-center-cubic (fcc) Ag, respectively. A dominant diffraction peak at  $2\theta = 38.08^\circ$  means that the (111) plane is the preferable growth direction. For Ag@MIP, the diffraction intensity of these four peaks significantly reduced.

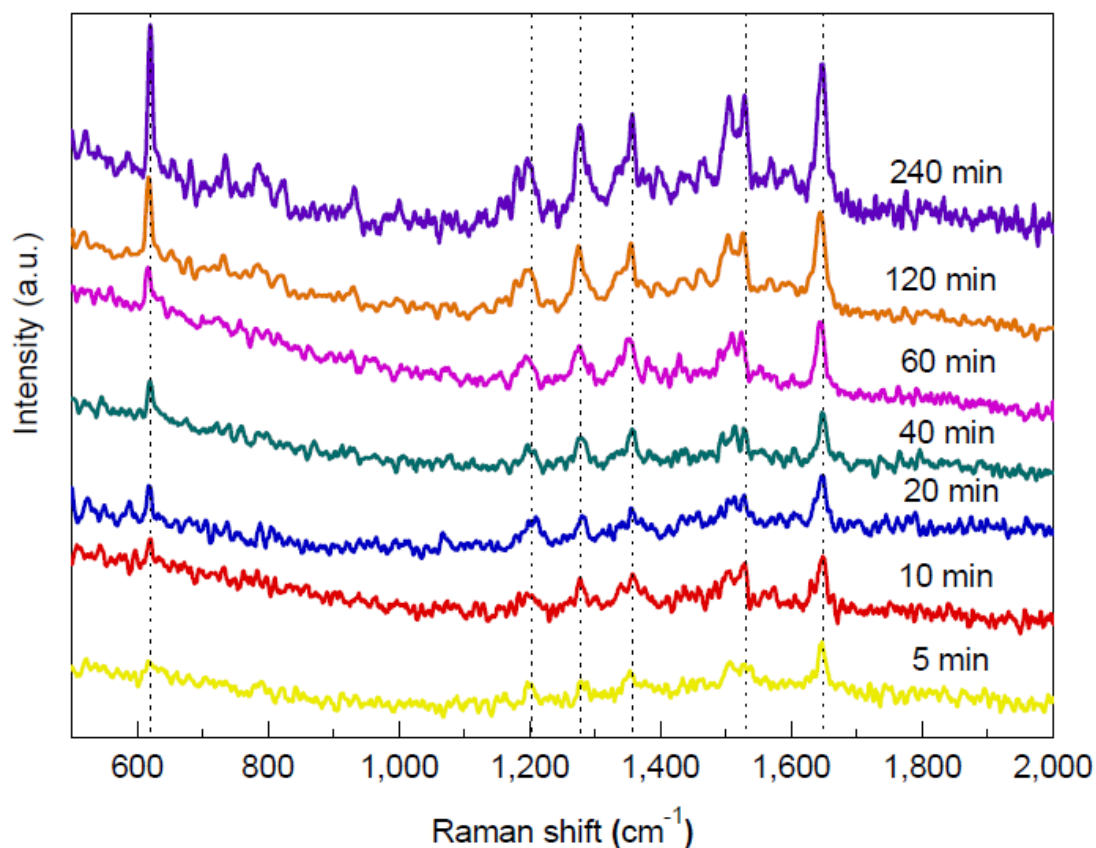

**Figure S3** Time-dependent SERS spectra showing RhB detection. Full spectra at 5min (yellow), 10min (red), 20min (blue), 40min (green), 60min (pink), 120min (golden yellow), and 240min (purple) show increasing SERS intensity over incubation time of Ag@MIP. All spectra were recorded at 633 nm excitation with a laser power of 140 nW.

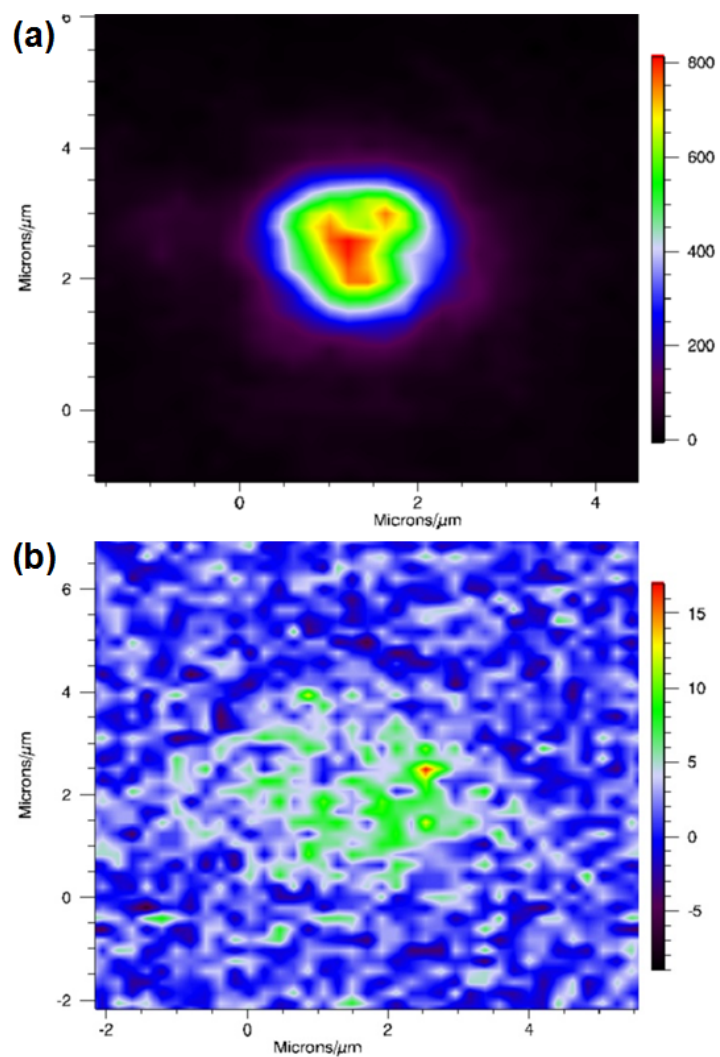

**Figure S4** The Raman images of Ag@MIP (a) and Ag particles (b) at 1647  $\text{cm}^{-1}$  peak with the excitation power of 0.69  $\mu\text{W}$ .
